# Supplementary material for: Pt1–O4 as active sites boosting CO oxidation via a non-classical Mars–van Krevelen mechanism
Source: Royal Society of Chemistry journal article supplement (doi:10.1039/d1cy00115a), 2021-01-01
Supplement: d1cy00115a1.pdf [file d1cy00115a1.pdf]

## Supporting Information

### **Pt<sub>1</sub>-O<sub>4</sub> as active sites boosting CO oxidation via a non-classical MvK mechanism**

**Yang Lou<sup>1,2,\*</sup>, Yongping Zheng<sup>3,\*</sup>, Wenyi Guo<sup>1</sup>, Jingyue Liu<sup>2\*</sup>**

*<sup>1</sup>Department of Physics, Arizona State University, Tempe, Arizona 85287, United States*

*<sup>2</sup>International Joint Research Center for Photoresponsive Molecules and Materials, Key Laboratory of Synthetic and Biological Colloids, Ministry of Education, School of Chemical and Material Engineering, Jiangnan University, Wuxi, Jiangsu 214122, China*

*<sup>3</sup>Functional Thin Films Research Center, Shenzhen Institutes of Advanced Technology, Chinese Academy of Sciences, Shen-zhen, 518055, China*

*\*Corresponding author: [yang.lou@jiangnan.edu.cn](mailto:yang.lou@jiangnan.edu.cn); [yp.zheng@siat.ac.cn](mailto:yp.zheng@siat.ac.cn); [jingyue.liu@asu.edu](mailto:jingyue.liu@asu.edu).*

## Contents:

Figure S1 Low-magnification and high-magnification aberration-corrected HAADF-STEM images of fresh Pt<sub>1</sub>/Fe<sub>2</sub>O<sub>3</sub> SAC.

Figure S2 Low-magnification and high-magnification aberration-corrected HAADF-STEM images of used Pt<sub>1</sub>/Fe<sub>2</sub>O<sub>3</sub> SAC.

Figure S3 Low-magnification and high-magnification aberration-corrected HAADF-STEM images of fresh Pt<sub>1</sub>/CeO<sub>2</sub> SAC.

Figure S4 Low-magnification and high-magnification aberration-corrected HAADF-STEM images of used Pt<sub>1</sub>/CeO<sub>2</sub> SAC.

Figure S5 Aberration-corrected HAADF-STEM images of nano-Pt/Fe<sub>2</sub>O<sub>3</sub> synthesized by the colloid method.

Figure S6 Aberration-corrected HAADF-STEM images of nano-Pt/CeO<sub>2</sub> synthesized by the colloid method.

Figure S7 Low-magnification and high-magnification aberration-corrected HAADF-STEM images of fresh Pt<sub>1</sub>/γ-Al<sub>2</sub>O<sub>3</sub> SAC.

Figure S8 Low-magnification and high-magnification aberration-corrected HAADF-STEM images of used Pt<sub>1</sub>/γ-Al<sub>2</sub>O<sub>3</sub> SAC.

Figure S9 The total catalyst specific rate of Pt<sub>1</sub>/Fe<sub>2</sub>O<sub>3</sub> SAC and nano-Pt/Fe<sub>2</sub>O<sub>3</sub> catalysts for CO oxidation over at 350 °C under the reaction conditions of different O<sub>2</sub>/CO ratios.

Figure S10 Apparent activation energy ( $E_a$ ) of CO oxidation over Pt<sub>1</sub>/Fe<sub>2</sub>O<sub>3</sub> (square symbols), Pt<sub>1</sub>/CeO<sub>2</sub> (triangle up symbols), nano-Pt/CeO<sub>2</sub> (triangle down symbols) and nano-Pt/Fe<sub>2</sub>O<sub>3</sub> (circle symbols) samples.

Figure S11 Low-magnification and high-magnification aberration-corrected HAADF-STEM images of used Pd<sub>1</sub>/Fe<sub>2</sub>O<sub>3</sub> SAC.

Figure S12 The TOF of Pd<sub>1</sub>/Fe<sub>2</sub>O<sub>3</sub> for CO oxidation in the temperature range of 200 °C to 350 °C.

Figure S13 The TOF of Pd<sub>1</sub>/Fe<sub>2</sub>O<sub>3</sub> and Pt<sub>1</sub>/Fe<sub>2</sub>O<sub>3</sub> SACs for CO oxidation from 40 °C to 140 °C (a), 140-300 °C (b), and 300-350 °C (c).

Figure S14 The k<sup>2</sup>-weighted Fourier transform spectra derived from the EXAFS on Pt SAC, nano-Pt catalysts and Pt foil.

Figure S15 The Bader charge plotted as a function of Pt oxidation state.

Figure S16 The side-view images of O<sub>2</sub> adsorption configurations.

Table S1 Specific Reaction Rate of Pt at 350 °C (mmolCO/(g<sub>Pt</sub>\*s)).

Table S2 EXAFS parameters of Pt SACs, nano-Pt catalysts and Pt foil.

Table S3 Free energy changes (ΔG) of elementary steps during CO oxidation by non-classic MvK mechanism.

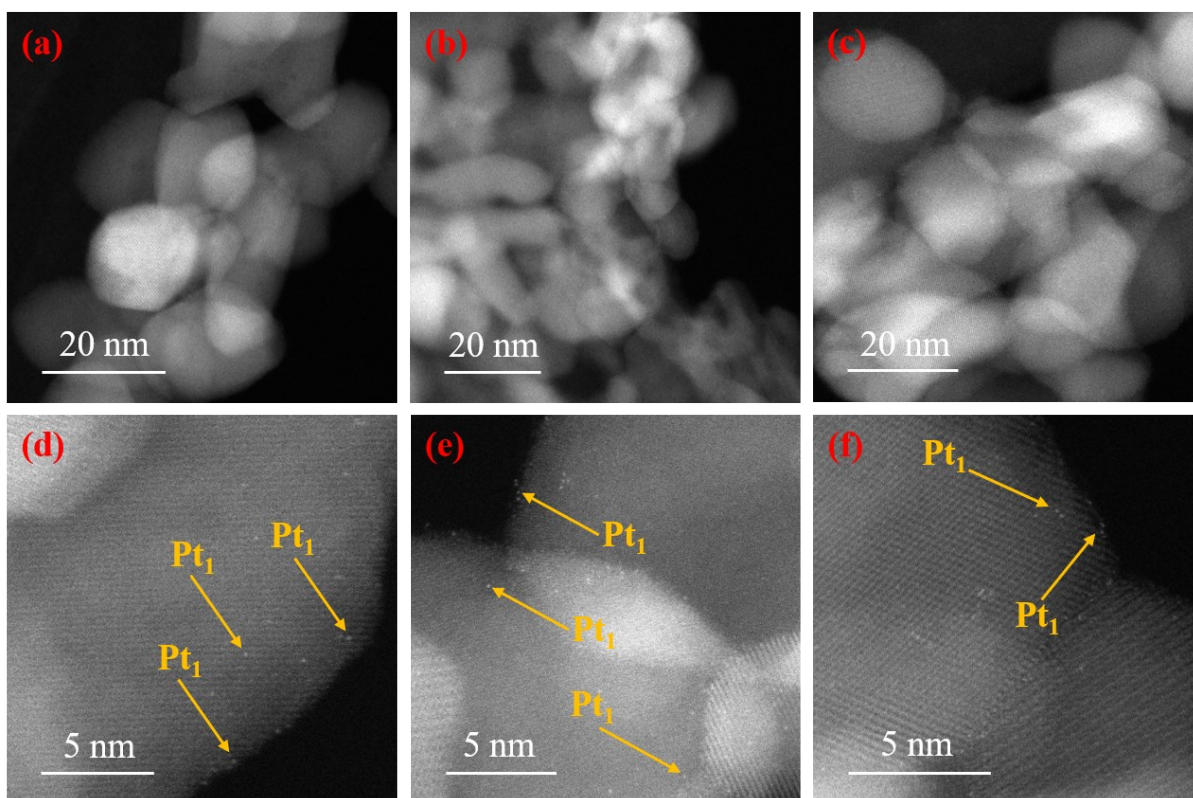

**Figure S1 Low-magnification and high-magnification aberration-corrected HAADF-STEM images of fresh  $\text{Pt}_1/\text{Fe}_2\text{O}_3$  SAC.**

As shown in the low-magnification images (a-c), there are no Pt particles present in the fresh  $\text{Pt}_1/\text{Fe}_2\text{O}_3$  SAC. Any Pt particles or clusters should appear as bright dots in HAADF images due to the strong Z-contrast. High-magnification images (d-f) confirm the presence of single Pt species distributed on the surfaces of the  $\text{Fe}_2\text{O}_3$  crystallites. Based on the HAADF-STEM images, we concluded that the fresh  $\text{Pt}_1/\text{Fe}_2\text{O}_3$  SAC contains only isolated single  $\text{Pt}_1$  atoms without the presence of any Pt clusters or particles.

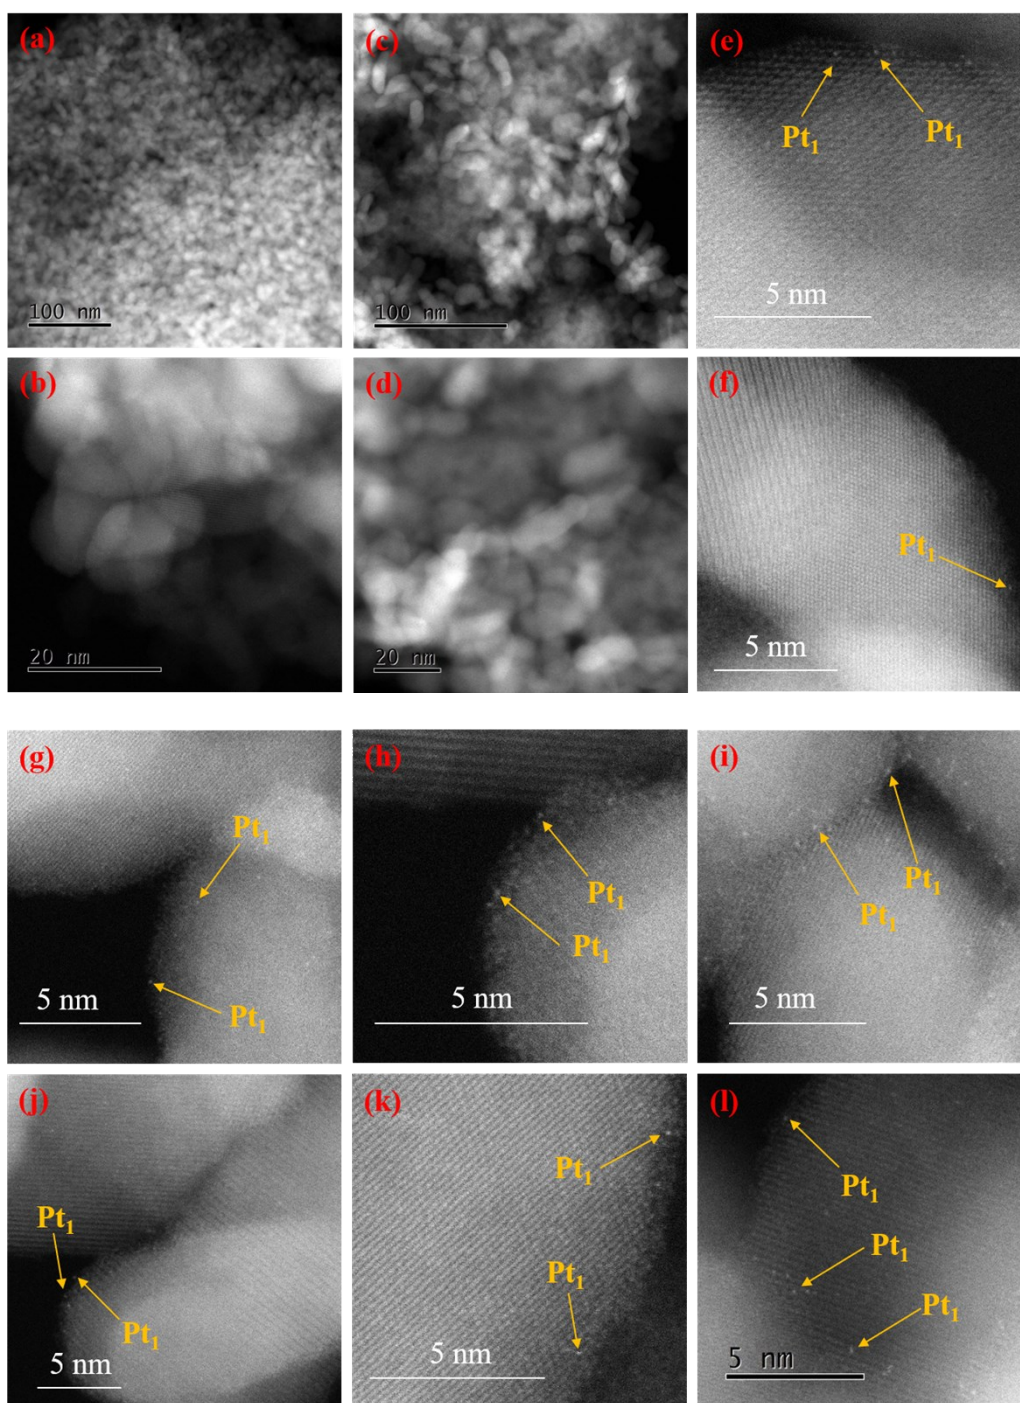

**Figure S2 Low-magnification and high-magnification aberration-corrected HAADF-STEM images of used Pt<sub>1</sub>/Fe<sub>2</sub>O<sub>3</sub> SAC.**

As shown in the low-magnification images (a-d), there are no Pt particles present in the used Pt<sub>1</sub>/Fe<sub>2</sub>O<sub>3</sub> SAC. High-magnification images (e-l), however, confirmed the presence of single Pt species on the Fe<sub>2</sub>O<sub>3</sub> crystallites after the catalytic reaction. Based on the HAADF-STEM images, we concluded that the Pt<sub>1</sub> atoms did not sinter into clusters or particles during the catalytic evaluations. Such data assures that the measured catalytic activity originated from the Pt<sub>1</sub> atoms rather than the Pt clusters or particles.

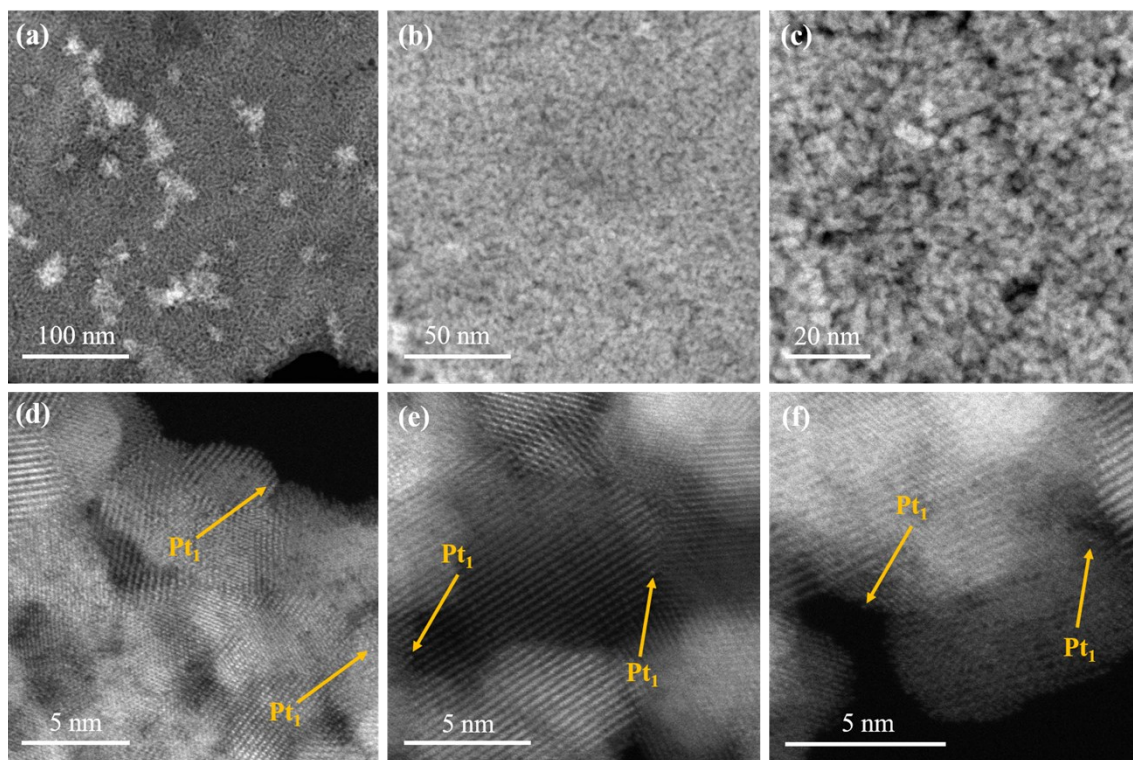

**Figure S3 Low-magnification and high-magnification aberration-corrected HAADF-STEM images of fresh Pt<sub>1</sub>/CeO<sub>2</sub> SAC.**

As shown in the low-magnification images (a-c), there are no Pt particles present in the fresh Pt<sub>1</sub>/CeO<sub>2</sub> SAC. High-magnification images (d-f) confirmed the presence of single Pt species in the fresh Pt<sub>1</sub>/CeO<sub>2</sub> SAC. Based on the HAADF-STEM images, we concluded that the as-synthesized Pt<sub>1</sub>/CeO<sub>2</sub> SAC contains only Pt<sub>1</sub> atoms without the presence of any Pt clusters or particles.

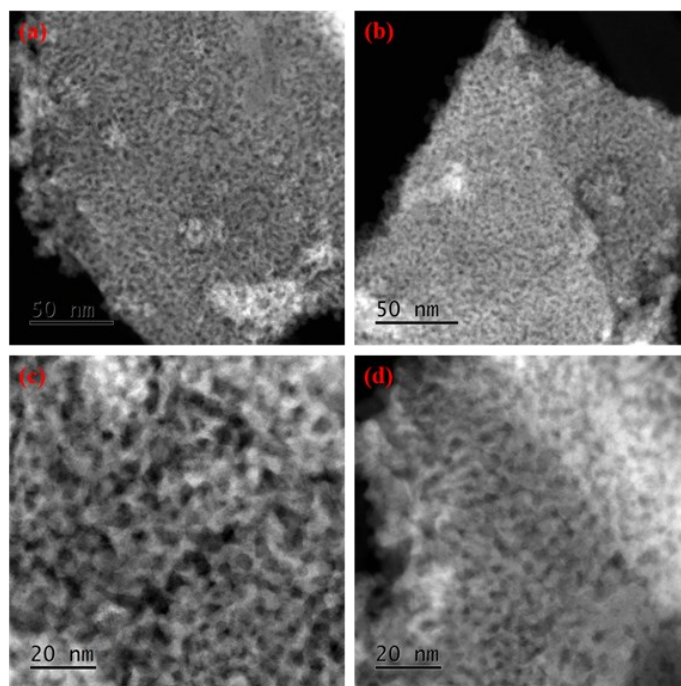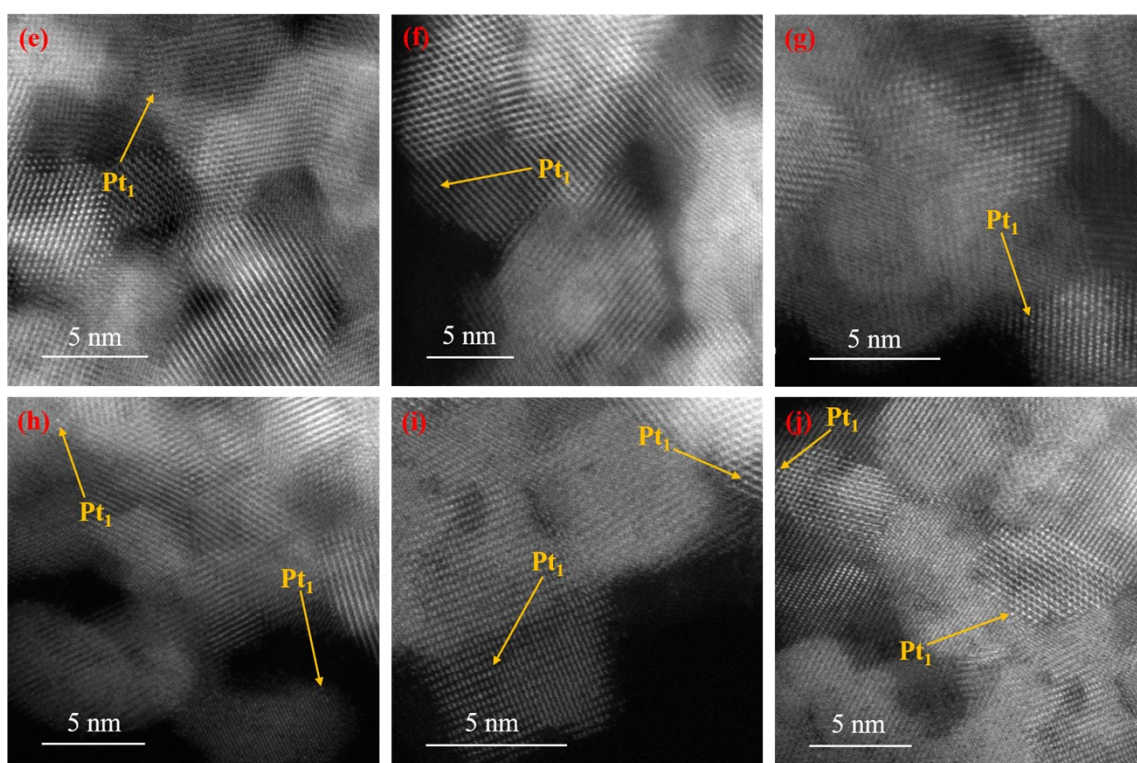

**Figure S4 Low-magnification and high-magnification aberration-corrected HAADF-STEM images of used  $\text{Pt}_1/\text{CeO}_2$  SAC.**

As shown in the low-magnification images (a-d), there are no Pt particles or clusters present in the used  $\text{Pt}_1/\text{CeO}_2$  SAC. High-magnification images (e-j) from different regions of the sample confirmed the presence of single Pt species after the catalytic reaction. Based on the HAADF-STEM images, we concluded that under the reaction condition, the  $\text{Pt}_1/\text{CeO}_2$  SAC contained only  $\text{Pt}_1$  atoms, which assures that the measured catalytic activity originated from the  $\text{Pt}_1$  atoms rather than the Pt clusters or particles.

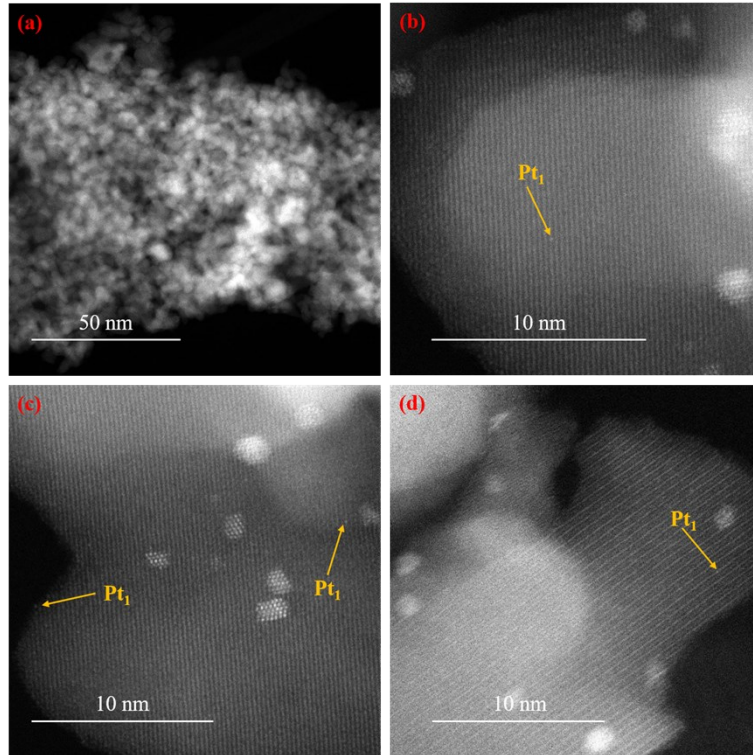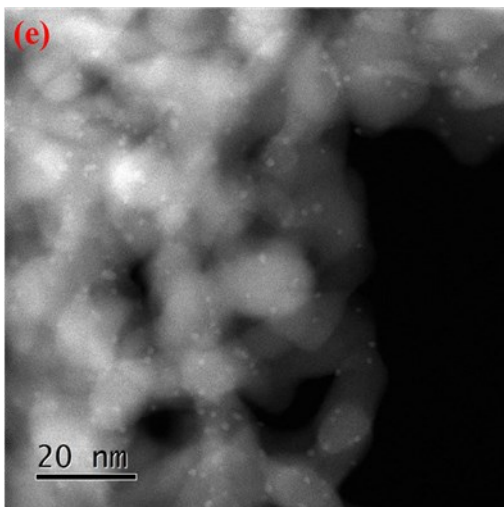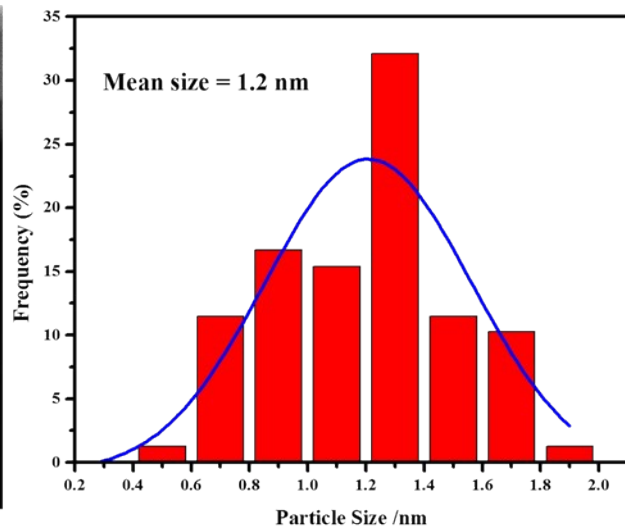

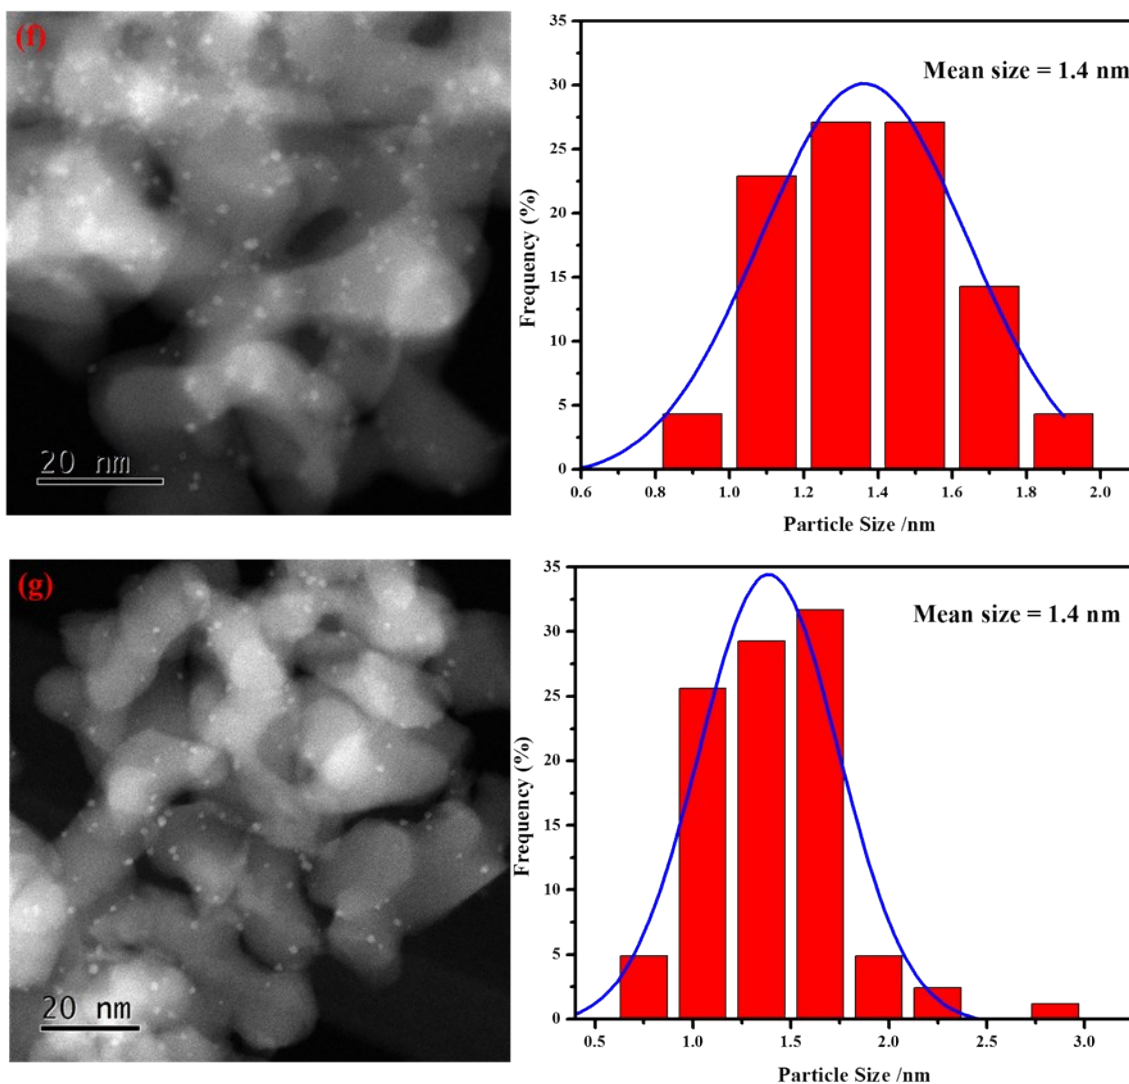

**Figure S5 Aberration-corrected HAADF-STEM images of nano-Pt/Fe<sub>2</sub>O<sub>3</sub> synthesized by the colloid method.**

The HAADF images show that the colloidal Pt particles are uniformly distributed in the as-prepared nano-Pt/Fe<sub>2</sub>O<sub>3</sub> catalyst. We did not detect any agglomeration of the colloidal Pt nanoparticles (Figure S5a). High-magnification images (Figure S5b-d) reveals that most of the colloidal Pt particles are single crystals. Some Pt atoms are also observable (indicated by the yellow arrows). As shown in the size distribution plots (Figure S5e-g), the average size of the colloidal Pt particles was estimated to be  $1.3 \pm 0.1$  nm with most of the Pt particles in the size range of 1-2 nm. The number of perimeter Pt atoms were calculated based on the semi-sphere model of the Pt particles without considering the specific shapes and other factors that may affect the estimation. The Pt-Pt bond length is 0.277 nm obtained from the EXAFS data.[1]



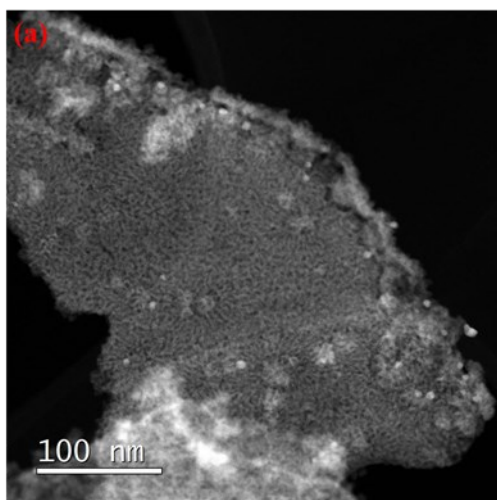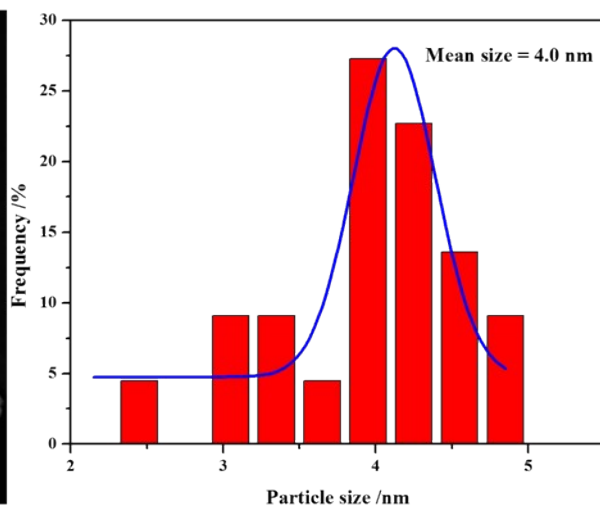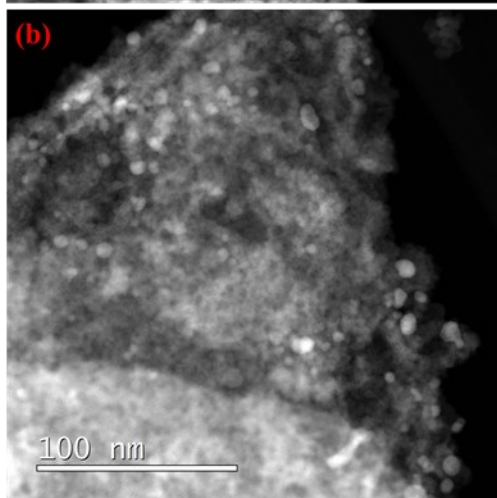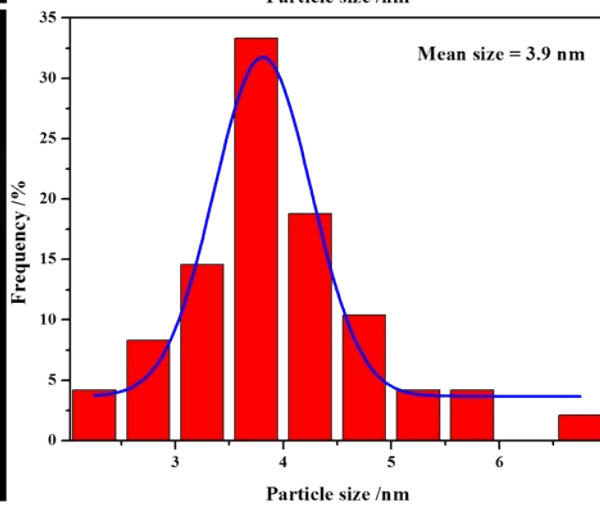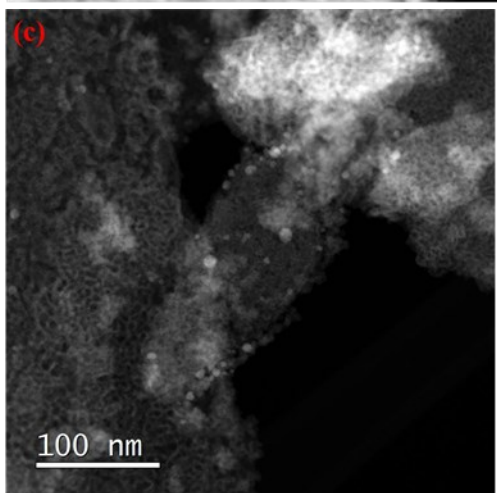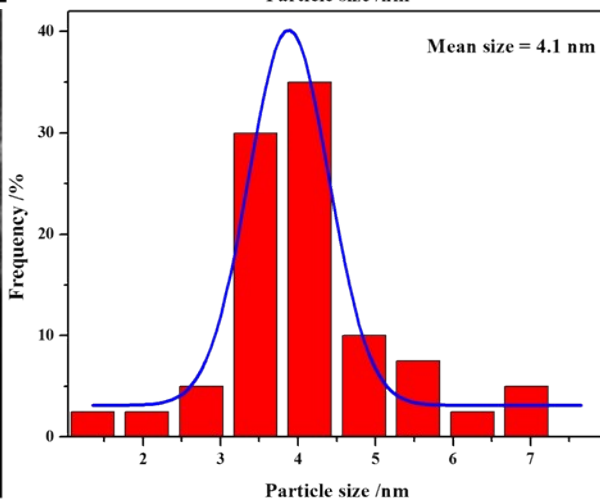

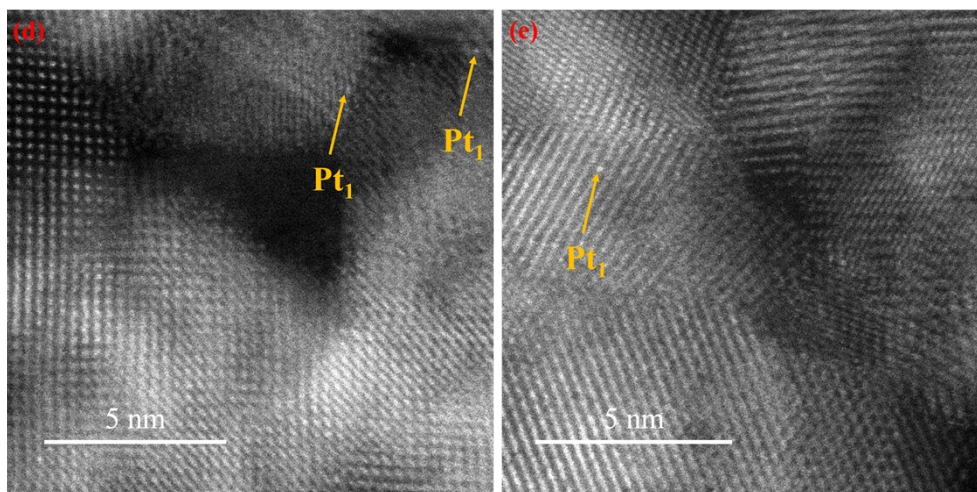

**Figure S6 Aberration-corrected HAADF-STEM images of nano-Pt/CeO<sub>2</sub> synthesized by the colloid method.**

The HAADF images show that the colloidal Pt particles are uniformly distributed in the as-prepared nano-Pt/CeO<sub>2</sub> catalyst. We did not detect agglomeration of the colloidal Pt nanoparticles. The Pt particle size distribution seems to be wide with the presence of larger Pt particles. Pt<sub>1</sub> atoms were also observed (indicated by the green arrows). The average size of the Pt colloidal particles was estimated to be  $4.0 \pm 0.1$  nm with particle sizes ranging from 1 nm to 7 nm. The number of perimeter Pt atoms were calculated based on the semi-sphere model of the Pt particles without considering the specific shapes and other factors that may affect the estimation. The Pt-Pt bond length is 0.277 nm obtained from the EXAFS data.[1]

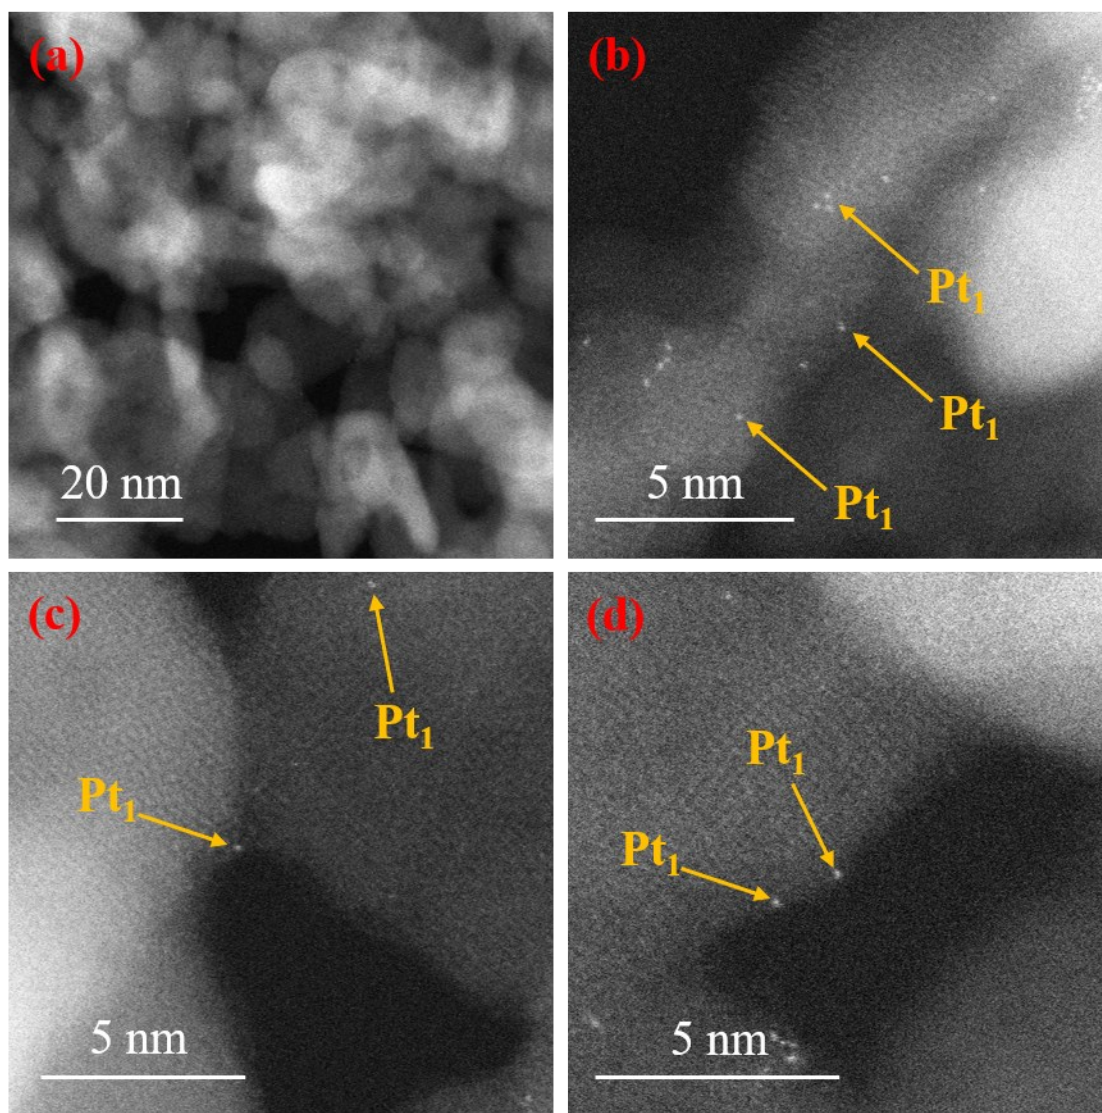

**Figure S7 Low-magnification and high-magnification aberration-corrected HAADF-STEM images of fresh  $\text{Pt}_1/\gamma\text{-Al}_2\text{O}_3$  SAC.**

As shown in the low-magnification image (a), there are no Pt particles present in the  $\text{Pt}_1/\gamma\text{-Al}_2\text{O}_3$  SAC. High-magnification images (b-d) confirmed the presence of single Pt species. Based on the HAADF-STEM images, we concluded that the as-synthesized  $\text{Pt}_1/\gamma\text{-Al}_2\text{O}_3$  SAC contains only  $\text{Pt}_1$  atoms without the presence of any Pt clusters or particles.

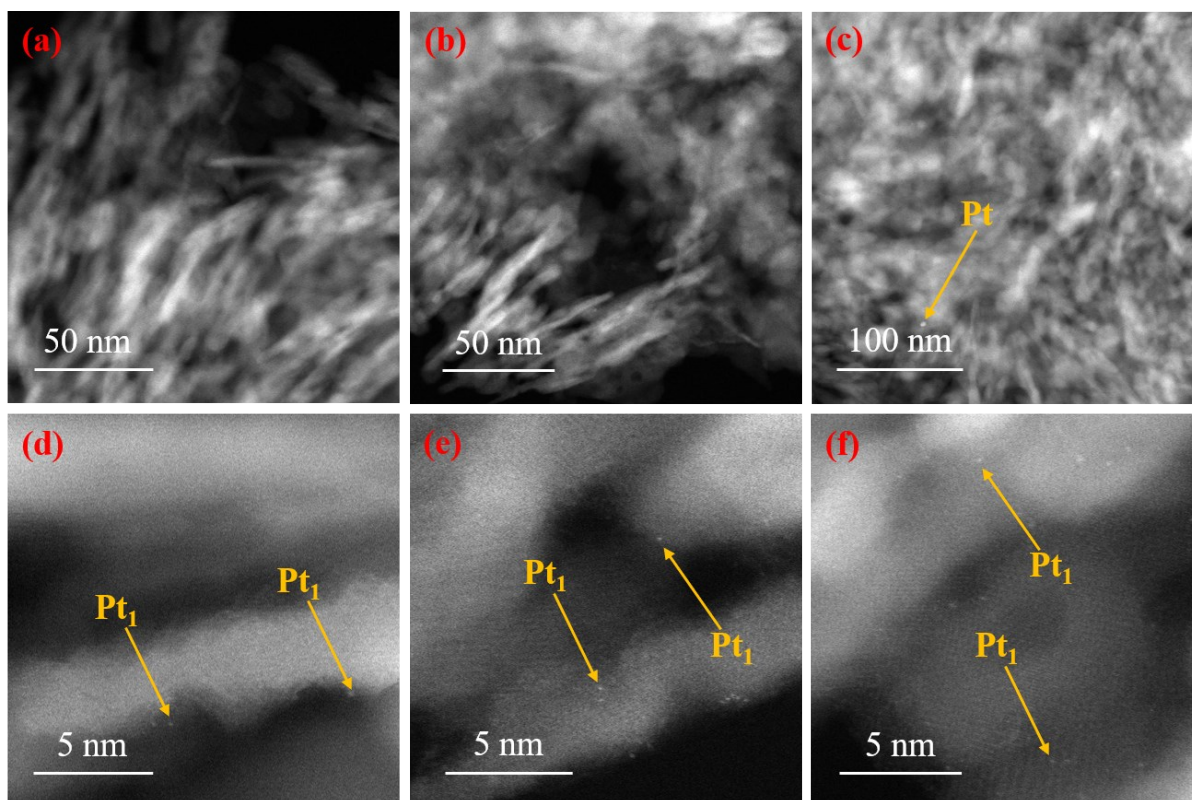

**Figure S8 Low-magnification and high-magnification aberration-corrected HAADF-STEM images of used Pt<sub>1</sub>/γ-Al<sub>2</sub>O<sub>3</sub> SAC.**

The low-magnification images (a-b) show that most of the regions do not contain any observable Pt clusters or particles. By examining numerous regions of the catalyst few Pt clusters/particles occasionally appear (c), suggesting that sintering of Pt<sub>1</sub> atoms may have occurred during the catalytic reaction. High-magnification images (b-d), however, confirmed that the majority of the Pt species are in the form of single atoms. Based on the HAADF-STEM images, we concluded that the used Pt<sub>1</sub>/γ-Al<sub>2</sub>O<sub>3</sub> SAC mainly contains Pt<sub>1</sub> atoms plus very few Pt clusters.

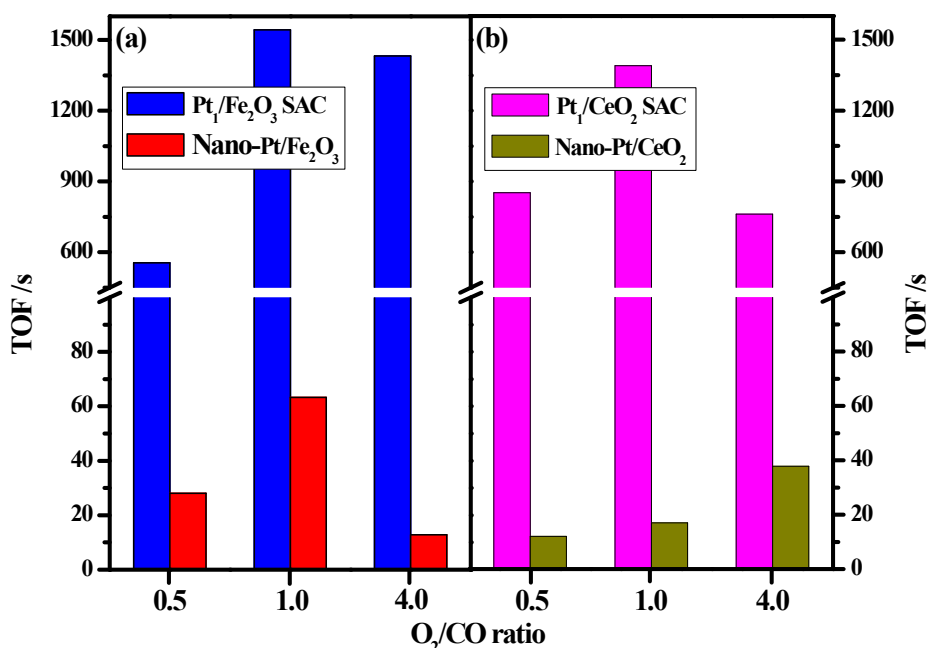

**Figure S9** The TOF of Pt<sub>1</sub> atoms and Pt particles of Pt<sub>1</sub>/Fe<sub>2</sub>O<sub>3</sub> SAC and nano-Pt/Fe<sub>2</sub>O<sub>3</sub> (a); Pt<sub>1</sub>/CeO<sub>2</sub> SAC and nano-Pt/CeO<sub>2</sub> (b). The TOF was measured in the feed gas of different O<sub>2</sub>/CO ratios at 350 °C with the space velocity of 17, 400 l/g·h to 52, 000 l/g·h and pressure = 0.1M Pa: 1) 1.0 vol.% CO, 4.0 vol.% O<sub>2</sub> and He balance (O<sub>2</sub>/CO = 4); 2) 2.5 vol.% CO, 2.5 vol.% O<sub>2</sub> and He balance (O<sub>2</sub>/CO = 1); 3) 2.5 vol.% CO, 1.25 vol.% O<sub>2</sub> and He balance (O<sub>2</sub>/CO = 0.5).

The TOFs of Pt<sub>1</sub> atoms on Pt<sub>1</sub>/Fe<sub>2</sub>O<sub>3</sub> SAC and Pt<sub>1</sub>/CeO<sub>2</sub> SAC are as high as 1542.7/s and 1389.3/s at 350 °C when the O<sub>2</sub>/CO volume ratio is adjusted to ~1 (feed gas of 2.5 vol.% CO, 2.5 vol.% O<sub>2</sub> and He balance). When the O<sub>2</sub>/CO ratio is increased to 4 (1.0 vol.% CO, 4.0 vol.% O<sub>2</sub> and He balance) or decreased to 0.5 (2.5 vol.% CO, 1.25 vol.% O<sub>2</sub> and He balance), the TOF values change to 1432.7/s and 554.8/s (over Pt<sub>1</sub>/Fe<sub>2</sub>O<sub>3</sub> SAC), and 852.5/s and 762.1/s (over Pt<sub>1</sub>/CeO<sub>2</sub> SAC), respectively. These results clearly demonstrate that the super activity of CO oxidation on the Pt<sub>1</sub> atoms is affected by the gas composition and that the nature of the support plays a major role as well.

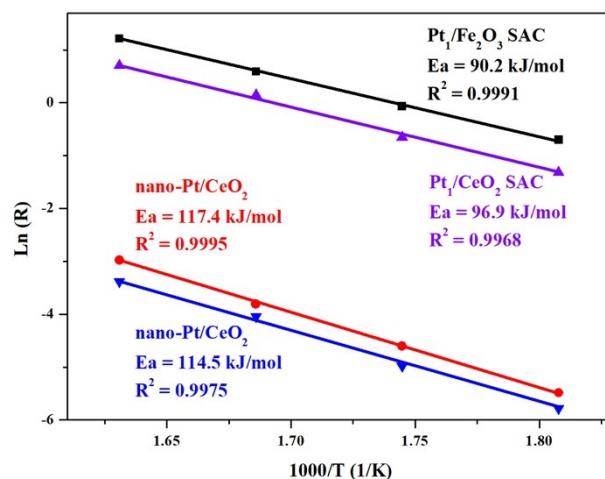

**Figure S10** Apparent activation energy ( $E_a$ ) of CO oxidation over Pt<sub>1</sub>/Fe<sub>2</sub>O<sub>3</sub> (square symbols), Pt<sub>1</sub>/CeO<sub>2</sub> (triangle up symbols), nano-Pt/CeO<sub>2</sub> (triangle down symbols) and nano-Pt/Fe<sub>2</sub>O<sub>3</sub> (circle symbols) samples. Arrhenius plots for the reaction rate on these samples in the temperature (T) range of 280 to 320 °C. Feed gas composition: 1 vol.% CO, 4 vol.% O<sub>2</sub> and He balance; space velocity: 9,000 l/g•h ~ 45,000 l/g•h; and Pressure: 0.1 MPa.

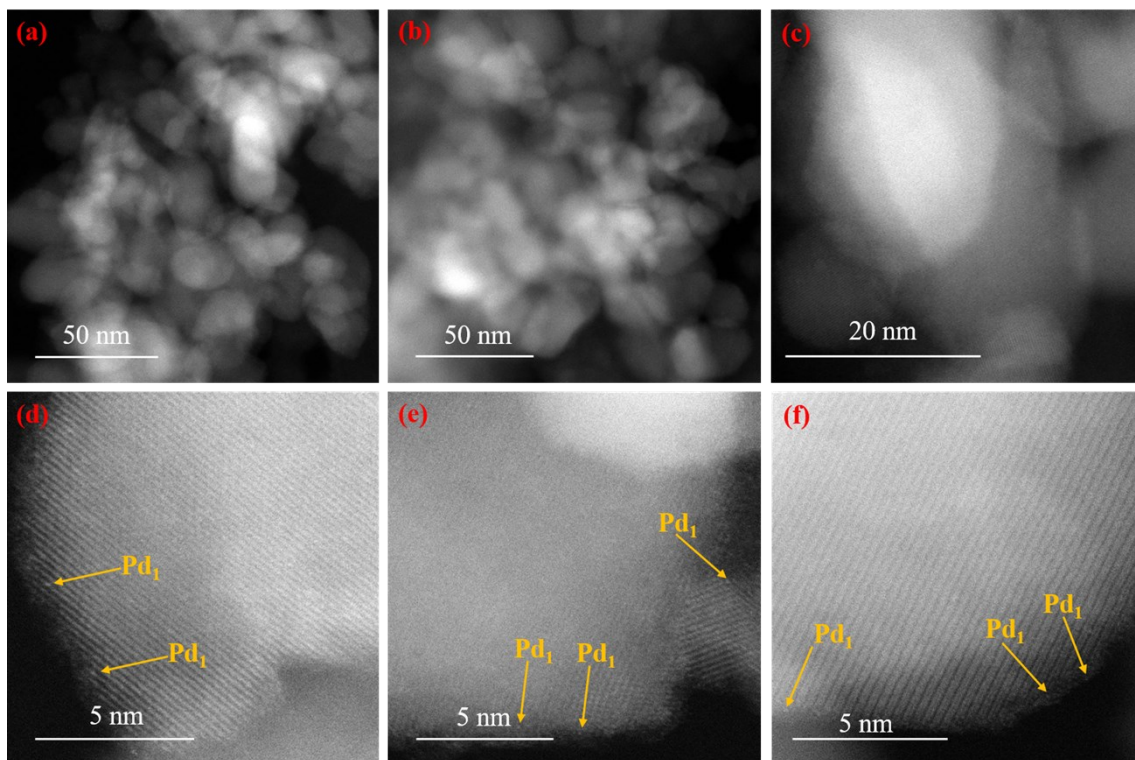

**Figure S11 Low-magnification and high-magnification aberration-corrected HAADF-STEM images of used Pd<sub>1</sub>/Fe<sub>2</sub>O<sub>3</sub>.**

As shown in the low-magnification images (a-c), there are no Pd particles/clusters present in the used Pd<sub>1</sub>/Fe<sub>2</sub>O<sub>3</sub> SAC. High-magnification images (d-f) from different regions of the catalyst confirmed the presence of single Pd species after the catalytic reaction. Based on the HAADF-STEM images, we concluded that the Pd<sub>1</sub> atoms did not sinter during the catalytic reaction, which assures that the measured catalytic activity originated from the Pd<sub>1</sub> atoms rather than the Pd clusters or particles.

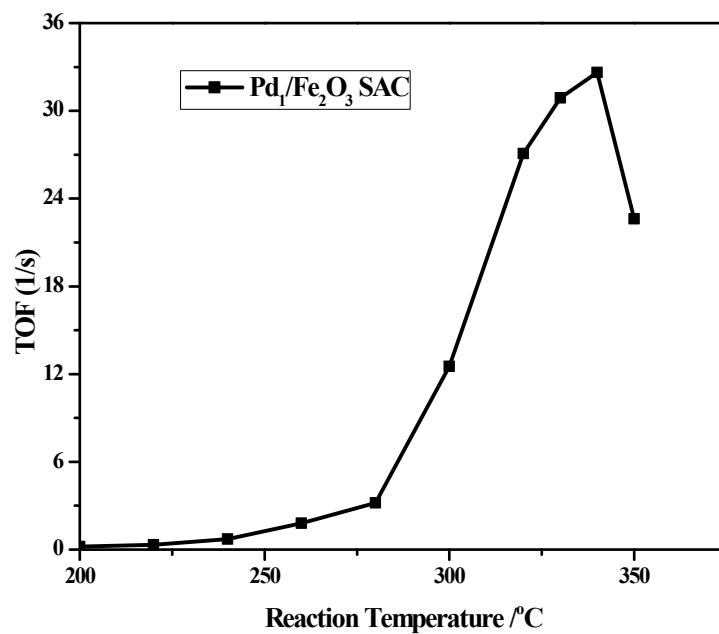

**Figure S12** The TOF over Pd<sub>1</sub>/Fe<sub>2</sub>O<sub>3</sub> SAC for CO oxidation in the temperature range of 200°C to 350°C.

Reaction conditions: 1.0 vol.% CO, 4.0 vol.% O<sub>2</sub> and He balance with the space velocity of 4, 200 l/g • h to 9, 000 l/g • h, pressure = 0.1M Pa.



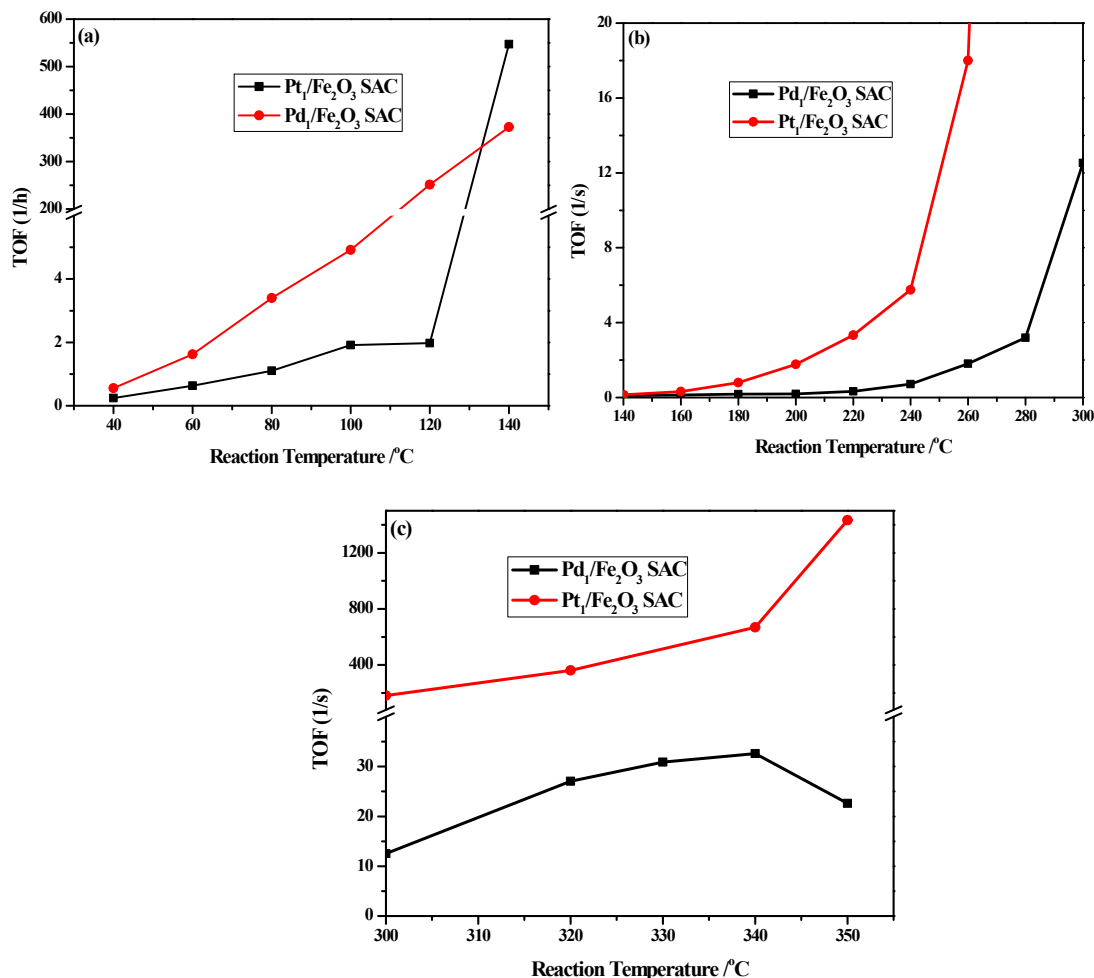

**Figure S13** The TOF of Pd<sub>1</sub>/Fe<sub>2</sub>O<sub>3</sub> and Pt<sub>1</sub>/Fe<sub>2</sub>O<sub>3</sub> SACs for CO oxidation from 40°C to 140°C (a), 140-300°C (b), and 300-350°C (c). Reaction conditions: 1.0 vol.% CO, 4.0 vol.% O<sub>2</sub> and He balance with the space velocity of 10 l/g · h to 9,000 l/g · h, pressure = 0.1M Pa.

For CO oxidation at low reaction temperatures (40°C to 120°C), the Pd<sub>1</sub>/Fe<sub>2</sub>O<sub>3</sub> SAC shows much higher activity than that of the Pt<sub>1</sub>/Fe<sub>2</sub>O<sub>3</sub> SAC as shown in Figure S13a. When the reaction temperature increases to 140 °C or higher (Figure 13 b-c), the TOF of the Pt<sub>1</sub>/Fe<sub>2</sub>O<sub>3</sub> SAC overtakes that of the Pd<sub>1</sub>/Fe<sub>2</sub>O<sub>3</sub> SAC and significantly increases at reaction temperatures > 260 °C. It is also interesting to note that the TOF of the Pd<sub>1</sub>/Fe<sub>2</sub>O<sub>3</sub> SAC reaches a maximum at around 340°C and then decreases with further increase in reaction temperature. The Pt<sub>1</sub>/Fe<sub>2</sub>O<sub>3</sub> SAC may exhibit a similar behavior at a higher reaction temperature. Such a behavior may be related to the structural changes between the Pt<sub>1</sub> atom and the support surfaces. Further experiments are needed to understand this phenomenon.

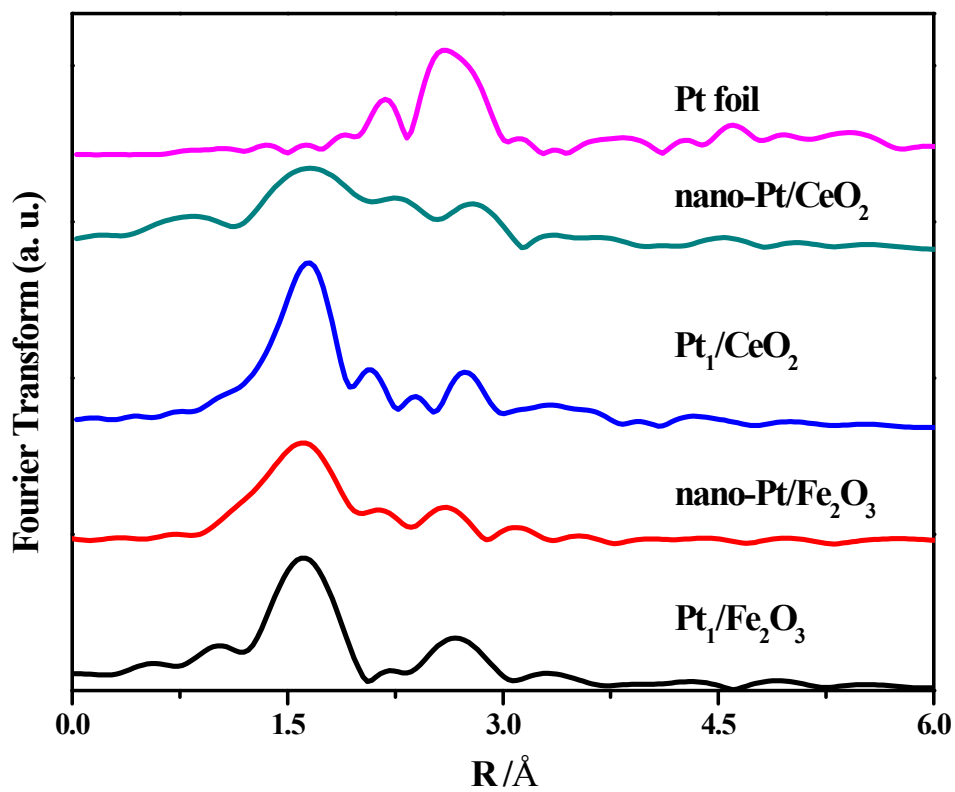

Figure S14 The k<sup>2</sup>-weighted Fourier transform spectra derived from the EXAFS on Pt SAC, nano-Pt catalysts and Pt foil; k ranges from 3.0 to 13.9 Å<sup>-1</sup>.

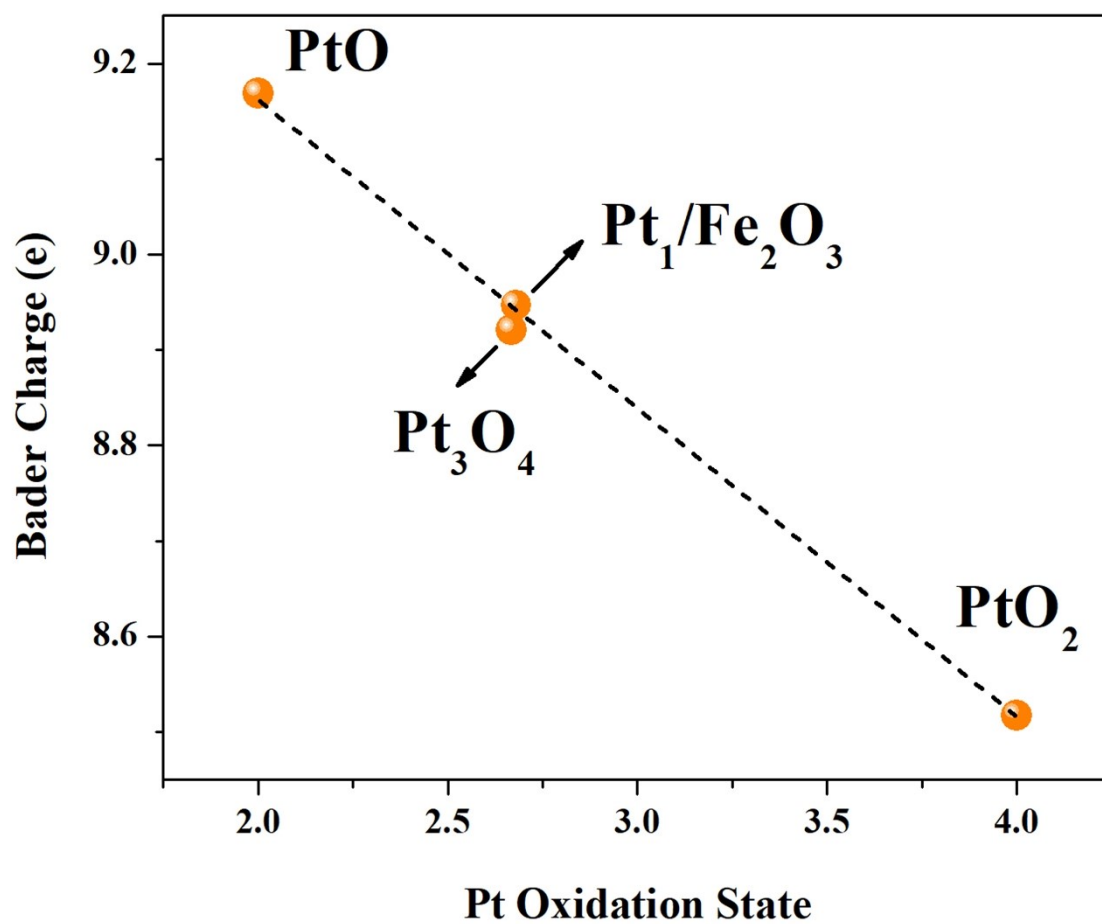

Figure S15 The Bader charge plotted as a function of Pt oxidation state.

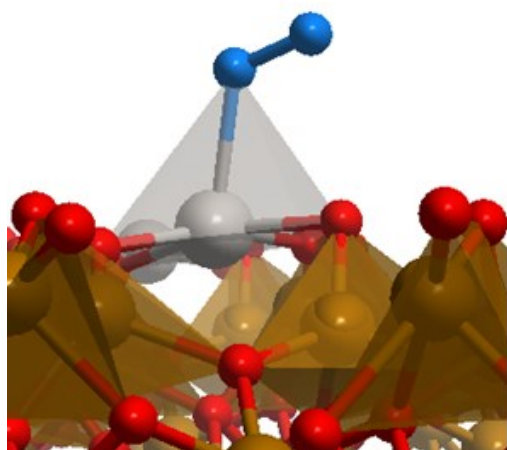

ii

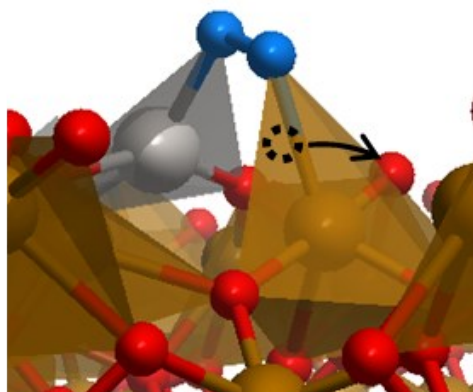

iii

Figure S16 The side-view images of O<sub>2</sub> adsorption configurations corresponding to (ii) and (iii) in Figure 6 in the main manuscript.

**Table S1 Specific Reaction Rate of Pt at 350 °C (mmolCO/(g<sub>Pt</sub>\*s))**

| Samples                                             | Ratio of O <sub>2</sub> to CO <sup>a</sup> |                  |        |
|-----------------------------------------------------|--------------------------------------------|------------------|--------|
|                                                     | 4.0                                        | 1.0              | 0.5    |
| Pt <sub>1</sub> /Fe <sub>2</sub> O <sub>3</sub> SAC | 7344.2                                     | 7908.3           | 2844.2 |
| Nano-Pt/Fe <sub>2</sub> O <sub>3</sub>              | 39.3                                       | 193.2            | 85.6   |
| Pt <sub>1</sub> /CeO <sub>2</sub> SAC               | 3906.6                                     | 7121.5           | 4370.0 |
| Nano-Pt/CeO <sub>2</sub>                            | 79.3                                       | 35.7             | 25.0   |
| Pt/Al <sub>2</sub> O <sub>3</sub>                   | /                                          | 0.2 <sup>b</sup> | /      |
| Pt/CeO <sub>2</sub> /Al <sub>2</sub> O <sub>3</sub> | /                                          | 1.0 <sup>b</sup> | /      |

- a: The specific reaction rates of Pt<sub>1</sub> atoms and Pt particles are measured in the feed gas of 1.0 vol.% CO, 4.0 vol.% O<sub>2</sub> and He balance (O<sub>2</sub>/CO=4.0); 2.5 vol.% CO, 2.5 vol.% O<sub>2</sub> and He balance (O<sub>2</sub>/CO=1.0); 2.5 vol.% CO, 1.25 vol.% O<sub>2</sub> and He balance (O<sub>2</sub>/CO=0.5).
- b: The specific reaction rate ratio of Pt is calculated based on the original data shown in Ref. [2] The O<sub>2</sub>/CO ratio was 1.1.

**Table S2 EXAFS parameters of Pt SACs, nano-Pt catalysts and Pt foil**

| Sample                                          | Shell | C. N. <sup>a</sup> | R (Å) | (h <sub>J</sub> ) <sub>t, s</sub> <sup>b</sup> | σ <sup>2</sup> |
|-------------------------------------------------|-------|--------------------|-------|------------------------------------------------|----------------|
| Pt <sub>1</sub> /Fe <sub>2</sub> O <sub>3</sub> | Pt-O  | 4.4                | 2.01  | 0.393                                          | 0.00092        |
|                                                 | Pt-Pt | /                  | /     |                                                | /              |
| Nano-Pt/Fe <sub>2</sub> O <sub>3</sub>          | Pt-O  | 2.8                | 2.01  | 0.365                                          | 0.00517        |
|                                                 | Pt-Pt | 1.9                | 2.75  |                                                | 0.00528        |
| Pt <sub>1</sub> /CeO <sub>2</sub>               | Pt-O  | 4.3                | 2.00  | 0.389                                          | 0.0006         |
|                                                 | Pt-Pt | /                  | /     |                                                | /              |
| Nano-Pt/CeO <sub>2</sub>                        | Pt-O  | 3.0                | 2.01  | 0.357                                          | 0.00867        |
|                                                 | Pt-Pt | 3.4                | 2.75  |                                                | 0.00617        |

a) C. N.: Coordination number.

b) (h<sub>J</sub>)<sub>t, s</sub> is Pt *d*-orbital vacancies per atom. The (h<sub>J</sub>)<sub>t, s</sub> is based on the simplified equation formula.[3-4] The total amount of *d*-band vacancies of Pt in the sample can be evaluated as: (h<sub>J</sub>)<sub>total, sample</sub> = (1.0 + f<sub>d</sub>) \* (h<sub>J</sub>)<sub>total, reference</sub>; f<sub>d</sub> = (A<sub>sample</sub> - A<sub>reference</sub>) / (A<sub>sample</sub> \* A<sub>reference</sub>), A<sub>sample</sub> is the Pt L<sub>3</sub> peak area of samples and A<sub>reference</sub> is the Pt L<sub>3</sub> peak area of Pt foil; The total amount of unoccupied *d*-states for pure Pt has been evaluated from band structure calculation is 0.3.[5-6]

**Table S3 Free energy changes ( $\Delta G$ ) of elementary steps during CO oxidation by non-classic MvK mechanism.**

| Steps                | $\Delta G$ (eV) |
|----------------------|-----------------|
| i $\rightarrow$ ii   | -0.03           |
| ii $\rightarrow$ iii | -0.07           |
| iii $\rightarrow$ iv | -2.12           |
| iv $\rightarrow$ iv  | -1.14           |
| v $\rightarrow$ i    | -2.68           |

## Reference

- 1 S. Mukerjee, S. Srinivasan, M. P. Soriaga, J. Mcbreen, Role of structural and electronic-properties of Pt and Pt alloys on electrocatalysis of oxygen reduction - an in-situ XANES and EXAFS investigation. *J Electrochem Soc.* **1995**, 142 (5),1409-1422.
- 2 M. Ozawa, T. Okouchi, M. Haneda, Three way catalytic activity of thermally degenerated Pt/Al<sub>2</sub>O<sub>3</sub> and Pt/CeO<sub>2</sub>-ZrO<sub>2</sub> modified Al<sub>2</sub>O<sub>3</sub> model catalysts, *Catal Today.* **2015**, 242, 329-337.
- 3 S. Mukerjee, S. Srinivasan, M. P. Soriaga, J. McBreen, Effect of Preparation Conditions of Pt Alloys on Their Electronic, Structural, and Electrocatalytic Activities for Oxygen Reduction - XRD, XAS, and Electrochemical Studies. *J. Phys. Chem.* **1995**, 99, 4577-4589.
- 4 A. N. Mansour, J. W. Cook, D. E. Sayers, Quantitative technique for the determination of the number of unoccupied d-electron states in a platinum catalyst using the L<sub>2,3</sub> X-ray absorption edge spectra. *J. Phys. Chem.* **1984**; 88, 2330-2334.
- 5 M. Brown, R. E. Peierls, E. A. Stern, White lines in x-ray absorption. *Phys. Rev. B.* **1977**, 15 (2): 738-744.
- 6 L. F. Mattheiss, R. E. Dietz, Relativistic tight-binding calculation of core-valence transitions in Pt and Au. *Phys. Rev. B.* **1980**, 22 (4), 1663-1676.
